# Supplementary material
Source: Research Square preprint supplement (doi:10.21203/rs.3.rs-9175809/v1)
Supplement: Supplementary file 1 [file d0b845f2ce66934dc8c1ea89.xlsx]

## Sheet: MatrixOutput
Table 1. Mean pairwise nucleotide distances (%) among PRRSV-2 ORF5 lineages and the candidate clade (JPL-A)
Average pairwise genetic distance (% difference) of intra- and inter-lineages
	L1	L2	L3	L5	L6	L7	L8	L9	L10	L11	L4	JPL-A
L1	0.116308
L2	0.150283	0.0986044
L3	0.162512	0.168244	0.123232
L5	0.142158	0.121647	0.152249	0.0489254
L6	0.154784	0.14918	0.175295	0.120198	0.0508604
L7	0.135015	0.12489	0.145432	0.0953802	0.118514	0.00326533
L8	0.148653	0.138312	0.159218	0.115036	0.129394	0.100889	0.0905819
L9	0.148837	0.139967	0.160888	0.118191	0.124615	0.0951196	0.111111	0.0952461
L10	0.143681	0.129908	0.154955	0.111417	0.13543	0.0912533	0.116398	0.113303	0.0159554
L11	0.139175	0.135496	0.15239	0.118982	0.137674	0.118992	0.13176	0.129064	0.128634	0.0864746
L4	0.144116	0.143894	0.156186	0.126236	0.144242	0.123696	0.137411	0.137733	0.125839	0.128499	0.10464
JPL-A	0.140342	0.147902	0.170172	0.140439	0.157202	0.131039	0.144607	0.142493	0.139244	0.13765	0.132191	0.093255
Mean pairwise nucleotide distances (%) were calculated in MEGA12 using p-distance with pairwise deletion and including all codon positions.
Diagonal values (bold) indicate within-lineage distances.
